# Supplementary material for: Molecular Cloning and Identification of NADPH Cytochrome P450 Reductase from Panax ginseng
Source: MDPI journal article supplement (doi:10.3390/molecules26216654), 2021-11-03
Supplement: s1 [file s1]

## Article

# Molecular cloning and identification of NADPH cytochrome P450 reductase from *Panax ginseng*

Xian Zou, Yue Zhang, Xu Zeng, Tuo Liu, Gui Li, Yuxin Dai, Yuanzhu Xie and Zhiyong Luo\*

<sup>1</sup> Department of Biochemistry and Molecular Biology, School of Life Sciences, Central South University, Changsha 410008, China; 172511011@csu.edu.cn (X.Z.); zhang1045242781@126.com (Y.Z.); xuzeng\_katharine@163.com (X.Z.); lt1994@csu.edu.cn (T.L.); ligui20061029@126.com (G.L.); yuxin\_dai@csu.edu.cn (Y.D.); 172511004@csu.edu.cn (Y.X.)

\* Correspondence: luozhiyong@csu.edu.cn; Tel.: +86-731-8480-5449

## Supplementary Materials:

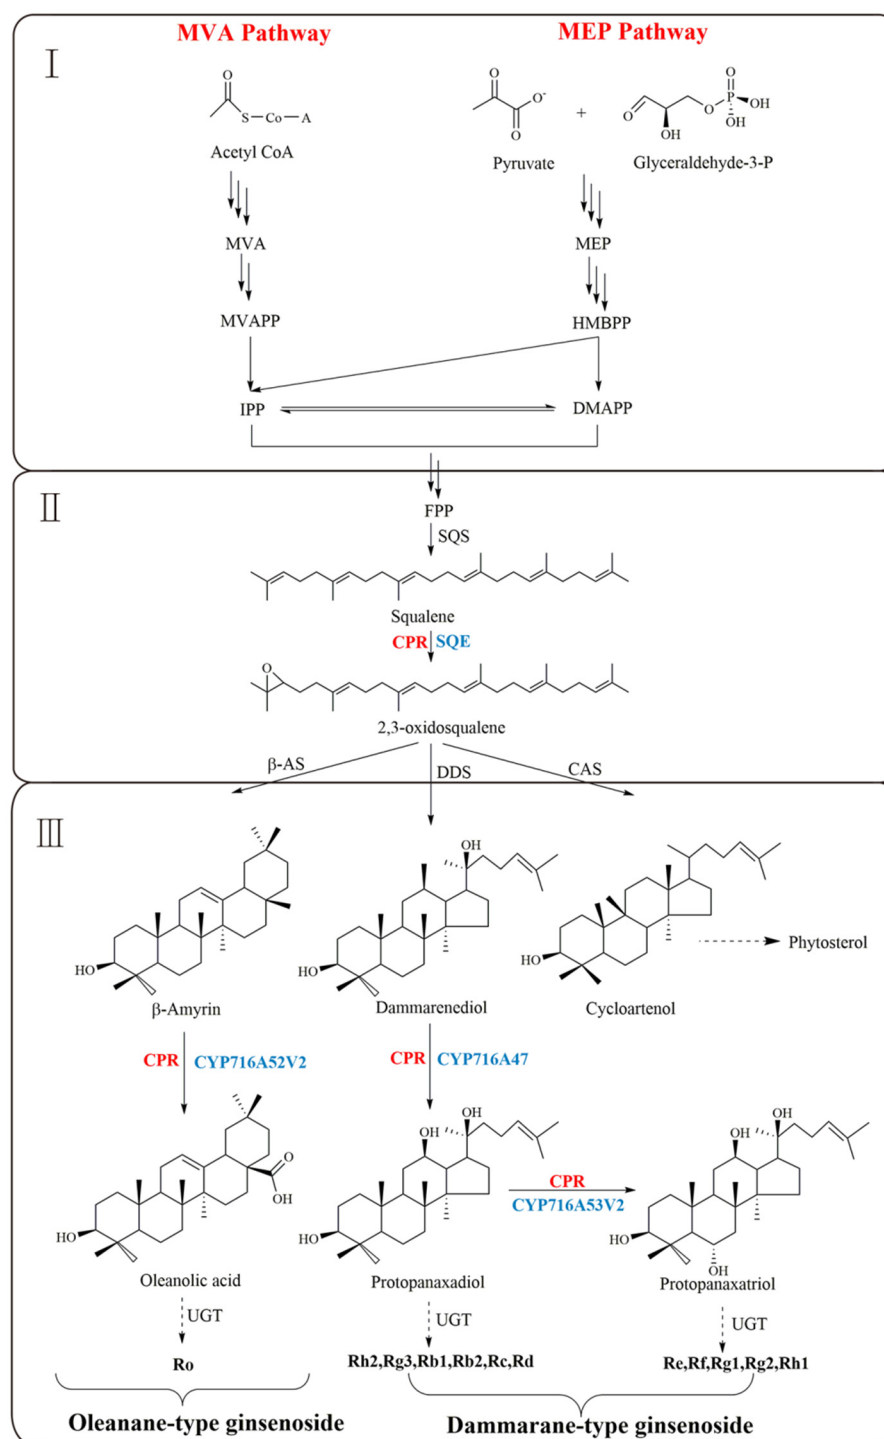

**Figure S1.** Main characteristic steps of the ginsenoside biosynthesis pathway. Ginsenoside synthesis pathway can consist of three parts. In the first part, is the MVA pathway and the MEP pathway. The second part, the formation of the tetracyclic framework. The third part is the modification of the skeleton. Among them, CYP450s and squalene epoxidase (SQE) play an important role in the ginsenoside synthesis pathway, which is marked in blue. All these enzymes need CPRs as a partner to be presented in red.

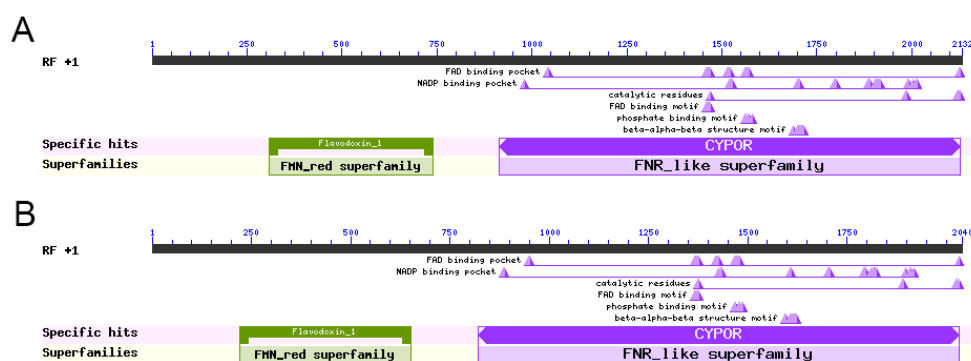

**Figure S2.** The conserved domains of PgCPR1 (A) and PgCPR2 (B). Predicted by the NCBI conserved domains finder (<https://www.ncbi.nlm.nih.gov/Structure/cdd/wrpsb.cgi>).

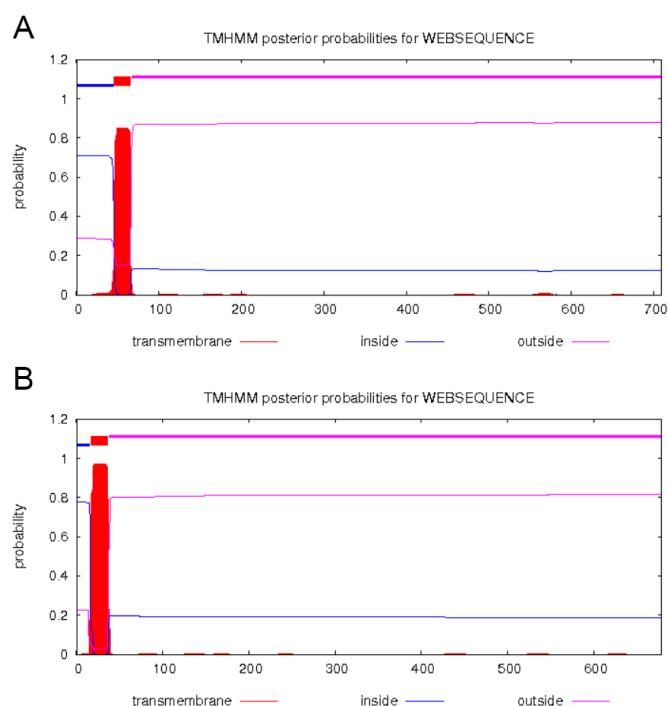

**Figure S3.** The transmembrane domain of PgCPR1 (A) and PgCPR2 (B). Predicted by TMHMM Server v. 2.0 (<http://www.cbs.dtu.dk/services/TMHMM/>).

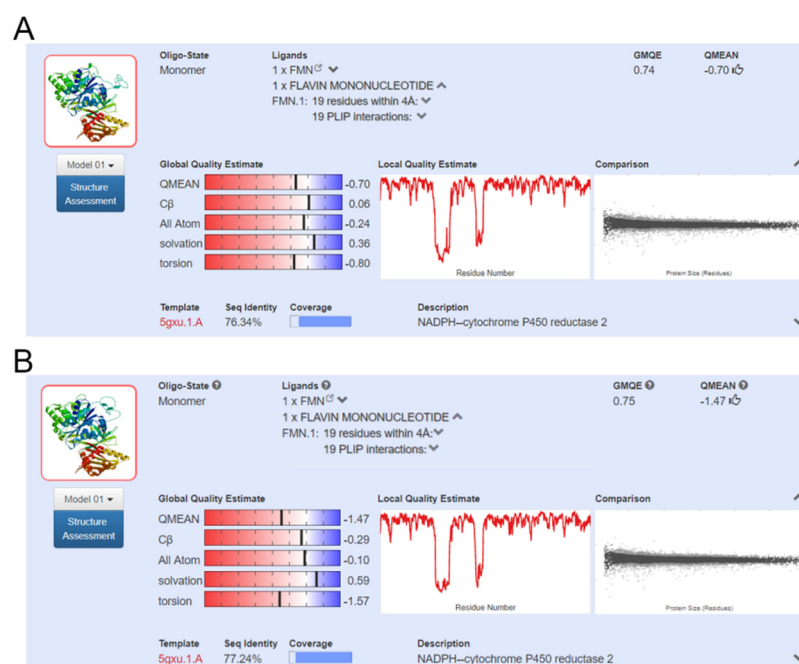

**Figure S4.** The protein tertiary structure analysis of PgCPR1 (**A**) and PgCPR2 (**B**). Predicted by SWISS-MODEL online tool (<https://swissmodel.expasy.org/>).

**Table S1.** List of primers used in this study.

| Primers              | Sequences(5'-3')                         | Application            |
|----------------------|------------------------------------------|------------------------|
| PgCPR1F              | ATGCTGAAAGTGTCTCCCTT                     | CDS cloning            |
| PgCPR1R              | TTACCATACATCACGCAGAT                     | CDS cloning            |
| PgCPR2F              | ATGGCTGCGATGCCGACGTC                     | CDS cloning            |
| PgCPR2R              | TTACCATACATCACGCAGAT                     | CDS cloning            |
| 28a-PgCPR1-HindIII F | cgagtgcggccgcaagcttgCCATACATCACGCAGATATC | Prokaryotic expression |
| 28a-PgCPR1-EcoR I R  | tgggtcgcggatccgaattcCGGAAATCGTCGAGCCAGAA | Prokaryotic expression |
| 28a-PgCPR2-HindIII F | cgagtgcggccgcaagcttgCCATACATCACGCAGATATC | Prokaryotic expression |
| 28a-PgCPR2-EcoR I R  | tgggtcgcggatccgaattcCGGAGATCGTCGAGCCAGCG | Prokaryotic expression |
| 28a-AtCPR1-HindIII F | cgagtgcggccgcaagcttgCCAGACATCTCTGAGGTATC | Prokaryotic expression |
| 28a-AtCPR1-EcoR I R  | tgggtcgcggatccgaattcTGAAGAAAACGACGGCGGA  | Prokaryotic expression |
| PgCPR1-qPCR F        | TTTTCGGCACGCAAACCTGGTA                   | Real-Time analysis     |
| PgCPR1-qPCR R        | GCTGCATTGTCGGTTGGTTCA                    | Real-Time analysis     |
| PgCPR2-qPCR F        | TGAGAAAACACCTACAGGACGAA                  | Real-Time analysis     |
| PgCPR2-qPCR R        | AAACCCCTAAAAGGAGCCAAT                    | Real-Time analysis     |

The lower-case letters were the overlap area of vectors, and the capital letters were the target.

genes.
